# Supplementary material for: Poor self-rated health predicts the incidence of functional disability in elderly community dwellers in Japan: a prospective cohort study
Source: PubMed Central journal article supplement (PMC7487733; doi:10.1186/s12877-020-01743-0), 2020-09-07
Supplement: 12877_2020_1743_MOESM2_ESM.pdf [file 12877_2020_1743_MOESM2_ESM.pdf]

Additional File 2. Time-dependent Cox regression analysis to predict functional disability in the self-rated health groups

|                          |                                                | Men  |            |          | Women |            |          |
|--------------------------|------------------------------------------------|------|------------|----------|-------|------------|----------|
|                          |                                                | HR   | 95% CI     | P values | HR    | 95% CI     | P values |
| <b>Blood pressure</b>    | <b>DBP (mmHg)</b>                              | 1.00 | 0.99, 1.00 | 0.661    |       |            |          |
| <b>Biochemical data</b>  | <b>TC (mg/dl)</b>                              |      |            |          | 1.00  | 0.99, 1.00 | 0.063    |
|                          | <b>Non-HDLC (mg/dl)</b>                        | 1.00 | 1.00, 1.00 | 0.083    | 1.00  | 1.00, 1.00 | 0.947    |
|                          | <b>Hb (g/dl)</b>                               | 0.94 | 0.90, 0.98 | 0.002    |       |            |          |
|                          | <b>HbA1c (%)</b>                               | 1.13 | 1.05, 1.22 | 0.001    | 1.13  | 1.07, 1.20 | <0.001   |
|                          | <b>eGFR (mL/min/1.73m<sup>2</sup>)</b>         | 0.98 | 0.97, 0.98 | <0.001   | 0.97  | 0.96, 0.97 | <0.001   |
| <b>Job status</b>        | <b>Non-employed or retired</b>                 | 1.39 | 1.23, 1.57 | <0.001   | 1.38  | 1.24, 1.53 | <0.001   |
| <b>Marital status</b>    | <b>Single (ref: married)</b>                   | 1.79 | 1.53, 2.11 | <0.001   | 1.39  | 1.28, 1.52 | <0.001   |
| <b>Drinking status</b>   | <b>Past drinker (ref: Never drinker)</b>       | 1.00 | 0.83, 1.21 | 0.998    |       |            |          |
|                          | <b>Drinker &lt; 1 day per week</b>             | 0.91 | 0.72, 1.15 | 0.405    |       |            |          |
|                          | <b>Drinker 1-4 days per week</b>               | 0.73 | 0.60, 0.88 | 0.001    |       |            |          |
|                          | <b>Drinker ≥5 days per week</b>                | 1.01 | 0.88, 1.16 | 0.930    |       |            |          |
| <b>Exercise habits</b>   | <b>&lt;1h per week (ref: &gt; 2h per week)</b> | 1.16 | 1.00, 1.34 | 0.044    | 1.17  | 1.01, 1.35 | 0.031    |
|                          | <b>1-2 h per week</b>                          | 1.08 | 0.85, 1.38 | 0.525    | 0.94  | 0.76, 1.17 | 0.598    |
| <b>Sleep duration</b>    | <b>≤ 6 h (ref: 7-8 h)</b>                      | 0.95 | 0.77, 1.18 | 0.633    |       |            |          |
|                          | <b>≥ 9 h</b>                                   | 1.33 | 1.18, 1.50 | <0.001   |       |            |          |
| <b>Self-rated health</b> | <b>Rather good (ref: good)</b>                 | 1.05 | 0.92, 1.20 | 0.496    | 1.13  | 1.01, 1.26 | 0.037    |
|                          | <b>Neither good nor poor</b>                   | 1.06 | 0.89, 1.26 | 0.539    | 1.29  | 1.13, 1.48 | <0.001   |
|                          | <b>Poor</b>                                    | 1.76 | 1.43, 2.16 | <0.001   | 1.93  | 1.66, 2.24 | <0.001   |

Abbreviations: CI, confidence interval; DBP, diastolic blood pressure; eGFR, estimated glomerular filtration rate; Hb, hemoglobin; HbA1c, glycosylated hemoglobin; HR, hazard ratios; non-HDLc, non-high-density lipoprotein cholesterol; TC, total cholesterol

Time dependent Cox regression analysis adjusted for the variables below

Men: diastolic blood pressure, non-high-density lipoprotein cholesterol, hemoglobin, glycosylated hemoglobin, estimated glomerular filtration rate, job status, marital status, alcohol drinking status, regular exercise habits, and sleep duration

Women: total cholesterol, non-high-density lipoprotein cholesterol, glycosylated hemoglobin, estimated glomerular filtration rate, job status, marital status, and regular exercise habits
