# Supplementary material for: Poor self-rated health predicts the incidence of functional disability in elderly community dwellers in Japan: a prospective cohort study
Source: Springer Nature journal article supplement (doi:10.1186/s12877-020-01743-0), 2020-09-07
Supplement: MOESM1 [file 18355010]

**Additional file 1. Hazard ratios for functional disability in the self-rated health groups using multivariate Cox regression analysis with exclusion of variables not related to self-rated health in the baseline comparison**

|                         |                                                    | Men (n=4333) |        |                 | Women(n=6627) |        |                 |      |            |                 |
|-------------------------|----------------------------------------------------|--------------|--------|-----------------|---------------|--------|-----------------|------|------------|-----------------|
|                         |                                                    | Model 1      |        | Model 2         | Model 1       |        | Model 2         |      |            |                 |
|                         |                                                    | HR           | 95% CI | <i>P</i> values | HR            | 95% CI | <i>P</i> values | HR   | 95% CI     | <i>P</i> values |
| <b>Blood pressure</b>   | <b>DBP (mmHg)</b>                                  |              |        | 1.00            | 0.99, 1.00    | 0.600  |                 |      |            |                 |
| <b>Biochemical data</b> | <b>TC (mg/dl)</b>                                  |              |        |                 |               |        |                 | 1.00 | 0.99, 1.00 | 0.063           |
|                         | <b>Non-HDLC (mg/dl)</b>                            |              |        | 1.00            | 1.00, 1.00    | 0.054  |                 | 1.00 | 1.00, 1.00 | 0.939           |
|                         | <b>Hb (g/dl)</b>                                   |              |        | 0.94            | 0.90, 0.98    | 0.003  |                 |      |            |                 |
|                         | <b>HbA1c (%)</b>                                   |              |        | 1.12            | 1.04, 1.21    | 0.003  |                 | 1.13 | 1.07, 1.20 | <0.001          |
|                         | <b>eGFR (mL/min/1.73m<sup>2</sup>)</b>             |              |        | 0.98            | 0.97, 0.98    | <0.001 |                 | 0.97 | 0.96, 0.97 | <0.001          |
| <b>Job status</b>       | <b>Non-employed or retired (ref: having a job)</b> |              |        | 1.38            | 1.22, 1.56    | <0.001 |                 | 1.38 | 1.24, 1.54 | <0.001          |
| <b>Marital status</b>   | <b>Single (ref: married)</b>                       |              |        | 1.79            | 1.52, 2.10    | <0.001 |                 | 1.39 | 1.28, 1.52 | <0.001          |
| <b>Drinking status</b>  | <b>Past drinker (ref: Never drinker)</b>           |              |        | 1.01            | 0.83, 1.23    | 0.910  |                 |      |            |                 |
|                         | <b>Drinker &lt; 1 day per week</b>                 |              |        | 0.92            | 0.72, 1.16    | 0.459  |                 |      |            |                 |
|                         | <b>Drinker 1-4 days per week</b>                   |              |        | 0.73            | 0.60, 0.89    | 0.002  |                 |      |            |                 |
|                         | <b>Drinker ≥5 days per week</b>                    |              |        | 1.00            | 0.87, 1.15    | 0.955  |                 |      |            |                 |

|                          |                                                |      |            |        |      |            |        |      |            |        |      |            |        |
|--------------------------|------------------------------------------------|------|------------|--------|------|------------|--------|------|------------|--------|------|------------|--------|
| <b>Exercise habits</b>   | <b>&lt;1h per week (ref: &gt; 2h per week)</b> |      |            |        | 1.14 | 0.99, 1.32 | 0.072  |      |            |        | 1.18 | 1.02, 1.36 | 0.026  |
|                          | <b>1-2 h per week</b>                          |      |            |        | 1.07 | 0.84, 1.36 | 0.601  |      |            |        | 0.96 | 0.77, 1.19 | 0.690  |
| <b>Sleep duration</b>    | <b>≤ 6 h (ref: 7-8 h)</b>                      |      |            |        | 0.94 | 0.76, 1.17 | 0.596  |      |            |        |      |            |        |
|                          | <b>≥ 9 h</b>                                   |      |            |        | 1.33 | 1.18, 1.50 | <0.001 |      |            |        |      |            |        |
| <b>Self-rated health</b> | <b>Rather good (ref: good)</b>                 | 1.11 | 0.98, 1.27 | 0.112  | 1.04 | 0.92, 1.19 | 0.520  | 1.15 | 1.03, 1.28 | 0.016  | 1.12 | 1.00, 1.25 | 0.044  |
|                          | <b>Neither good nor poor</b>                   | 1.21 | 1.02, 1.45 | 0.032  | 1.06 | 0.89, 1.27 | 0.497  | 1.39 | 1.21, 1.59 | <0.001 | 1.29 | 1.13, 1.48 | <0.001 |
|                          | <b>Poor</b>                                    | 2.07 | 1.69, 2.54 | <0.001 | 1.74 | 1.42, 2.14 | <0.001 | 2.13 | 1.83, 2.48 | <0.001 | 1.92 | 1.65, 2.24 | <0.001 |

Abbreviations: CI, confidence interval; DBP, diastolic blood pressure; eGFR, estimated glomerular filtration rate; Hb, hemoglobin; HbA1c, glycosylated hemoglobin; HR, hazard ratios; non-HDLC, non-high-density lipoprotein cholesterol; TC, total cholesterol

Model 1: basic model

Model 2: adjusted for the variables below

Men: diastolic blood pressure, non-high-density lipoprotein cholesterol, hemoglobin, glycosylated hemoglobin, estimated glomerular filtration rate, job status, marital status, alcohol drinking status, regular exercise habits, and sleep duration

Women: total cholesterol, non-high-density lipoprotein cholesterol, glycosylated hemoglobin, estimated glomerular filtration rate, job status, marital status, and regular exercise habits
