# Supplementary material for: Poor self-rated health predicts the incidence of functional disability in elderly community dwellers in Japan: a prospective cohort study
Source: Springer Nature journal article supplement (doi:10.1186/s12877-020-01743-0), 2020-09-07
Supplement: MOESM3 [file 18355010]

**Additional File 3. Comparison of hazard ratios for the risk of functional disability in the self-rated health groups with and without objective indicators (adjusted model)**

|                         |                                          | Men (n=4333)       |            |           |                           |            | Women(n=6627) |                    |            |           |                           |            |          |
|-------------------------|------------------------------------------|--------------------|------------|-----------|---------------------------|------------|---------------|--------------------|------------|-----------|---------------------------|------------|----------|
|                         |                                          | Without indicators |            | objective | With objective indicators |            |               | Without indicators |            | objective | With objective indicators |            |          |
|                         |                                          | HR                 | 95% CI     | P values  | HR                        | 95% CI     | P values      | HR                 | 95% CI     | P values  | HR                        | 95% CI     | P values |
| <b>Blood pressure</b>   | <b>DBP (mmHg)</b>                        |                    |            |           | 1.00                      | 0.99, 1.00 | 0.600         |                    |            |           |                           |            |          |
| <b>Biochemical data</b> | <b>TC (mg/dl)</b>                        |                    |            |           |                           |            |               |                    |            |           | 1.00                      | 0.99, 1.00 | 0.063    |
|                         | <b>Non-HDLC (mg/dl)</b>                  |                    |            |           | 1.00                      | 1.00, 1.00 | 0.054         |                    |            |           | 1.00                      | 1.00, 1.00 | 0.939    |
|                         | <b>Hb (g/dl)</b>                         |                    |            |           | 0.94                      | 0.90, 0.98 | 0.003         |                    |            |           |                           |            |          |
|                         | <b>HbA1c (%)</b>                         |                    |            |           | 1.12                      | 1.04, 1.21 | 0.003         |                    |            |           | 1.13                      | 1.07, 1.20 | <0.001   |
|                         | <b>eGFR (mL/min/1.73m<sup>2</sup>)</b>   |                    |            |           | 0.98                      | 0.97, 0.98 | 0.757         |                    |            |           | 0.97                      | 0.96, 0.97 | <0.001   |
| <b>Job status</b>       | <b>Non-employed or retired</b>           | 1.45               | 1.28, 1.64 | <0.001    | 1.38                      | 1.22, 1.56 | 0.012         | 1.48               | 1.34, 1.65 | <0.001    | 1.38                      | 1.24, 1.54 | <0.001   |
| <b>Marital status</b>   | <b>Single (ref: married)</b>             | 1.81               | 1.54, 2.12 | <0.001    | 1.79                      | 1.52, 2.10 | <0.001        | 1.46               | 1.34, 1.59 | <0.001    | 1.39                      | 1.28, 1.52 | <0.001   |
| <b>Drinking status</b>  | <b>Past drinker (ref: Never drinker)</b> | 1.06               | 0.87, 1.28 | 0.581     | 1.01                      | 0.83, 1.23 | 0.910         |                    |            |           |                           |            |          |
|                         | <b>Drinker &lt; 1 day per week</b>       | 0.91               | 0.72, 1.15 | 0.417     | 0.92                      | 0.72, 1.16 | 0.459         |                    |            |           |                           |            |          |
|                         | <b>Drinker 1-4 days per week</b>         | 0.71               | 0.59, 0.87 | 0.001     | 0.73                      | 0.60, 0.89 | 0.002         |                    |            |           |                           |            |          |
|                         | <b>Drinker ≥5 days per week</b>          | 0.93               | 0.81, 1.06 | 0.276     | 1.00                      | 0.87, 1.15 | 0.955         |                    |            |           |                           |            |          |

|                          |                                                |      |            |        |      |            |        |      |            |        |      |            |        |
|--------------------------|------------------------------------------------|------|------------|--------|------|------------|--------|------|------------|--------|------|------------|--------|
| <b>Exercise habits</b>   | <b>&lt;1h per week (ref: &gt; 2h per week)</b> | 1.12 | 0.98, 1.30 | 0.107  | 1.14 | 0.99, 1.32 | 0.072  | 1.20 | 1.04, 1.39 | 0.013  | 1.18 | 1.02, 1.36 | 0.026  |
|                          | <b>1-2 h per week</b>                          | 1.07 | 0.84, 1.37 | 0.565  | 1.07 | 0.84, 1.36 | 0.601  | 0.97 | 0.79, 1.21 | 0.81   | 0.96 | 0.77, 1.19 | 0.69   |
| <b>Sleep duration</b>    | <b>≤ 6 h (ref: 7-8 h)</b>                      | 0.96 | 0.77, 1.19 | 0.714  | 0.94 | 0.76, 1.17 | 0.596  |      |            |        | 1.06 | 0.93, 1.21 | 0.376  |
|                          | <b>≥ 9 h</b>                                   | 1.35 | 1.20, 1.52 | <0.001 | 1.33 | 1.18, 1.50 | <0.001 |      |            |        | 1.14 | 1.04, 1.26 | 0.006  |
| <b>Self-rated health</b> | <b>Rather good (ref: good)</b>                 | 1.07 | 0.94, 1.22 | 0.322  | 1.04 | 0.92, 1.19 | 0.520  | 1.14 | 1.02, 1.28 | 0.020  | 1.12 | 1.00, 1.25 | 0.044  |
|                          | <b>Neither good nor poor</b>                   | 1.11 | 0.93, 1.32 | 0.271  | 1.06 | 0.89, 1.27 | 0.497  | 1.33 | 1.17, 1.53 | <0.001 | 1.29 | 1.13, 1.48 | <0.001 |
|                          | <b>Poor</b>                                    | 1.84 | 1.50, 2.26 | <0.001 | 1.74 | 1.42, 2.14 | <0.001 | 2.05 | 1.76, 2.38 | <0.001 | 1.92 | 1.65, 2.24 | <0.001 |

Abbreviations: CI, confidence interval; DBP, diastolic blood pressure; eGFR, estimated glomerular filtration rate; Hb, hemoglobin; HbA1c, glycosylated hemoglobin; HR, hazard ratios; non-HDLC, non-high-density lipoprotein cholesterol; TC, total cholesterol
