# Supplementary material for: Poor self-rated health predicts the incidence of functional disability in elderly community dwellers in Japan: a prospective cohort study
Source: Springer Nature journal article supplement (doi:10.1186/s12877-020-01743-0), 2020-09-07
Supplement: MOESM4 [file 18355010]

**Additional File 4. Hazard ratios for future functional disability in the self-rated health groups stratified by baseline data utilizing multivariate Cox regression analysis**

|                          |                             |                                | Men  |            |                 | Women |            |                 |
|--------------------------|-----------------------------|--------------------------------|------|------------|-----------------|-------|------------|-----------------|
|                          |                             |                                | HR   | 95% CI     | <i>P</i> values | HR    | 95% CI     | <i>P</i> values |
| <b>Age</b>               | <b>Age &lt;75 years</b>     | <b>Rather good (ref: good)</b> | 1.10 | 0.91, 1.32 | 0.326           | 1.19  | 1.03, 1.38 | 0.021           |
|                          |                             | <b>Neither good nor poor</b>   | 1.22 | 0.96, 1.54 | 0.109           | 1.37  | 1.14, 1.64 | 0.001           |
|                          |                             | <b>Poor</b>                    | 1.91 | 1.44, 2.54 | <0.001          | 2.14  | 1.75, 2.61 | <0.001          |
|                          | <b>Age ≥75 years</b>        | <b>Rather good (ref: good)</b> | 1.09 | 0.90, 1.32 | 0.384           | 1.07  | 0.91, 1.27 | 0.404           |
|                          |                             | <b>Neither good nor poor</b>   | 1.10 | 0.84, 1.44 | 0.489           | 1.35  | 1.10, 1.67 | 0.004           |
|                          |                             | <b>Poor</b>                    | 1.84 | 1.36, 2.49 | <0.001          | 1.87  | 1.48, 2.37 | <0.001          |
| <b>Hypertension</b>      | <b>Hypertension</b>         | <b>Rather good (ref: good)</b> | 0.98 | 0.82, 1.16 | 0.805           | 1.09  | 0.94, 1.26 | 0.263           |
|                          |                             | <b>Neither good nor poor</b>   | 0.96 | 0.76, 1.21 | 0.722           | 1.25  | 1.05, 1.49 | 0.012           |
|                          |                             | <b>Poor</b>                    | 1.72 | 1.31, 2.24 | <0.001          | 1.74  | 1.43, 2.11 | <0.001          |
|                          | <b>No hypertension</b>      | <b>Rather good (ref: good)</b> | 1.12 | 0.91, 1.37 | 0.286           | 1.09  | 0.92, 1.30 | 0.313           |
|                          |                             | <b>Neither good nor poor</b>   | 1.20 | 0.90, 1.58 | 0.217           | 1.26  | 1.01, 1.57 | 0.039           |
|                          |                             | <b>Poor</b>                    | 1.67 | 1.20, 2.32 | 0.002           | 2.13  | 1.67, 2.72 | <0.001          |
| <b>Diabetes mellitus</b> | <b>Diabetes mellitus</b>    | <b>Rather good (ref: good)</b> | 1.08 | 0.71, 1.66 | 0.715           | 1.26  | 0.85, 1.86 | 0.256           |
|                          |                             | <b>Neither good nor poor</b>   | 1.17 | 0.69, 2.00 | 0.564           | 0.99  | 0.62, 1.58 | 0.966           |
|                          |                             | <b>Poor</b>                    | 1.97 | 1.13, 3.44 | 0.017           | 1.89  | 1.18, 3.01 | 0.008           |
|                          | <b>No diabetes mellitus</b> | <b>Rather good (ref: good)</b> | 1.04 | 0.91, 1.20 | 0.548           | 1.11  | 0.99, 1.25 | 0.071           |
|                          |                             | <b>Neither good nor poor</b>   | 1.08 | 0.89, 1.30 | 0.456           | 1.33  | 1.15, 1.53 | <0.001          |
|                          |                             | <b>Poor</b>                    | 1.72 | 1.37, 2.16 | <0.001          | 1.94  | 1.65, 2.28 | <0.001          |
| <b>Dyslipidemia</b>      | <b>Dyslipidemia</b>         | <b>Rather good (ref: good)</b> | 1.21 | 0.94, 1.55 | 0.146           | 1.13  | 0.95, 1.34 | 0.158           |
|                          |                             | <b>Neither good nor poor</b>   | 1.09 | 0.76, 1.56 | 0.657           | 1.28  | 1.04, 1.57 | 0.021           |
|                          |                             | <b>Poor</b>                    | 1.64 | 1.13, 2.39 | 0.010           | 2.02  | 1.61, 2.53 | <0.001          |
|                          | <b>No Dyslipidemia</b>      | <b>Rather good (ref: good)</b> | 0.99 | 0.85, 1.16 | 0.884           | 1.12  | 0.97, 1.30 | 0.128           |
|                          |                             | <b>Neither good nor poor</b>   | 1.04 | 0.85, 1.28 | 0.709           | 1.31  | 1.10, 1.56 | 0.003           |

**Poor**

1.85

1.44, 2.37

<0.001

1.89

1.54, 2.33

<0.001

---

Abbreviations: CI, confidence interval; HR, hazard ratios

Hazard ratios adjusted for the variables below

Men: diastolic blood pressure, non-high-density lipoprotein cholesterol, hemoglobin, glycosylated hemoglobin, estimated glomerular filtration rate, job status, marital status, alcohol drinking status, regular exercise habits, and sleep duration

Women: total cholesterol, non-high-density lipoprotein cholesterol, glycosylated hemoglobin, estimated glomerular filtration rate, job status, marital status, and regular exercise habits
