# Supplementary material for: Poor self-rated health predicts the incidence of functional disability in elderly community dwellers in Japan: a prospective cohort study
Source: Springer Nature journal article supplement (doi:10.1186/s12877-020-01743-0), 2020-09-07
Supplement: MOESM5 [file 18355010]

**Additional File 5. Comparison of the distribution of self-rated health between Comprehensive Survey of Living Conditions in Japan in 2004 and the present study**

| <b>Self-rated health</b>     | <b>Men</b>                                       |                      | <b>Women</b>                                     |                      |
|------------------------------|--------------------------------------------------|----------------------|--------------------------------------------------|----------------------|
|                              | <b>Comprehensive Survey of Living Conditions</b> | <b>Present study</b> | <b>Comprehensive Survey of Living Conditions</b> | <b>Present study</b> |
|                              | <b>%</b>                                         | <b>%</b>             | <b>%</b>                                         | <b>%</b>             |
| <b>Good</b>                  | 16.0                                             | 32.6                 | 11.5                                             | 37.5                 |
| <b>Rather good</b>           | 15.5                                             | 45.9                 | 14.5                                             | 76.0                 |
| <b>Neither good nor poor</b> | 44.6                                             | 14.7                 | 45.6                                             | 26.4                 |
| <b>Poor</b>                  | 23.9                                             | 6.8                  | 26.7                                             | 13.1                 |
